# Supplementary material for: The HaloTag: Improving Soluble Expression and Applications in Protein Functional Analysis
Source: PubMed Central journal article supplement — Curr Chem Genomics. 2012 Sep 20;6:8–17. doi: 10.2174/1875397301206010008 (PMC3480702; doi:10.2174/1875397301206010008), 2012-09-20
Supplement: TOCHGENJ-6-8_SD1.pdf [file TOCHGENJ-6-8_SD1.pdf]

# SUPPLEMENTARY MATERIAL

## The HaloTag: Improving Soluble Expression and Applications in Protein Functional Analysis

Scott N. Peterson and Keehwan Kwon\*

*J. Craig Venter Institute, 9704 Medical Center Drive, Rockville, Maryland 20850, USA*

**Supplementary Table 1. Expression and solubility of proteins of interest with various HaloTag expression vectors**

| Locus ID          | Protein name                                                  | Species                                        | pFN18A |     | pGW-nHalo |     | pFN19A |     | pFC20A |     | pFC14A |     |
|-------------------|---------------------------------------------------------------|------------------------------------------------|--------|-----|-----------|-----|--------|-----|--------|-----|--------|-----|
|                   |                                                               |                                                | Exp    | Sol | Exp       | Sol | Exp    | Sol | Exp    | Sol | Exp    | Sol |
| b0071             | LeuC                                                          | <i>Escherichia coli str. K12 substr. W3110</i> |        |     |           |     | 1      | 1   | 1      | 1   |        |     |
| b0072             | LeuD                                                          | <i>Escherichia coli str. K12 substr. W3110</i> |        |     |           |     | 1      | 1   | 1      | 1   |        |     |
| b2023             | HisF                                                          | <i>Escherichia coli str. K12 substr. W3110</i> |        |     |           |     | 0      | 0   | 0      | 0   |        |     |
| b2025             | HisH                                                          | <i>Escherichia coli str. K12 substr. W3110</i> |        |     |           |     | 1      | 1   | 1      | 1   |        |     |
| b2231             | RpoA                                                          | <i>Escherichia coli str. K12 substr. W3110</i> |        |     |           |     | 1      | 1   | 1      | 1   |        |     |
| b3295             | RpoB                                                          | <i>Escherichia coli str. K12 substr. W3110</i> |        |     |           |     | 1      | 1   | 0      | 0   |        |     |
| b3699             | GyrA                                                          | <i>Escherichia coli str. K12 substr. W3110</i> |        |     |           |     | 1      | 1   | 1      | 1   |        |     |
| b3987             | GyrB                                                          | <i>Escherichia coli str. K12 substr. W3110</i> |        |     |           |     | 1      | 1   | 1      | 1   |        |     |
| BMA_0267          | site-specific recombinase, phage integrase family, truncation | <i>B. mallei ATCC23344</i>                     |        |     | 1         | 0   |        |     |        |     |        |     |
| BMA_0429          | cytidylate kinase                                             | <i>B. mallei ATCC23344</i>                     |        |     | 1         | 1   |        |     |        |     |        |     |
| BMA_2469          | transketolase                                                 | <i>B. mallei ATCC23344</i>                     |        |     | 1         | 1   |        |     |        |     |        |     |
| BMA_3281          | flagellar M-ring protein FlIF                                 | <i>B. mallei ATCC23344</i>                     |        |     | 0         | 0   |        |     |        |     |        |     |
| BMA_A0079_26_486  | plcN                                                          | <i>B. mallei ATCC23344</i>                     |        |     | 0         | 0   |        |     |        |     |        |     |
| BMA_A0079_519_718 | plcN                                                          | <i>B. mallei ATCC23344</i>                     |        |     | 1         | 1   |        |     |        |     |        |     |
| BMA_A0238         | hypothetical protein                                          | <i>B. mallei ATCC23344</i>                     |        |     | 1         | 0   |        |     |        |     |        |     |
| BMA_A0410_1_519   | vgrG3                                                         | <i>B. mallei ATCC23344</i>                     |        |     | 0         | 0   |        |     |        |     |        |     |
| BMA_A0446         | vgrG2.2                                                       | <i>B. mallei ATCC23344</i>                     |        |     | 1         | 1   |        |     |        |     |        |     |
| BMA_A0553         | Ser/Thr protein phosphatase family protein                    | <i>B. mallei ATCC23344</i>                     |        |     | 0         | 0   |        |     |        |     |        |     |
| BMA_A0679         | phosphatase, CheC family                                      | <i>B. mallei ATCC23344</i>                     |        |     | 1         | 1   |        |     |        |     |        |     |
| BMA_A0728         | type VI secretion system protein TssN                         | <i>B. mallei ATCC23344</i>                     |        |     | 1         | 1   |        |     |        |     |        |     |



Supplementary Table 1. Contd.....

| Locus ID | Protein name                                 | Species                                  | pFN18A |     | pGW-nHalo |     | pFN19A |     | pFC20A |     | pFC14A |     |
|----------|----------------------------------------------|------------------------------------------|--------|-----|-----------|-----|--------|-----|--------|-----|--------|-----|
|          |                                              |                                          | Exp    | Sol | Exp       | Sol | Exp    | Sol | Exp    | Sol | Exp    | Sol |
| PB1      | PB1                                          | Influenza A (A/New York/1682/2009(H1N1)) |        |     |           |     |        |     |        |     | 1      | N/A |
| PB2      | PB2                                          | Influenza A (A/New York/1682/2009(H1N1)) |        |     |           |     |        |     |        |     | 1      | N/A |
| SP_0058  | transcriptional regulator, GntR family       | <i>S. pneumoniae TIGR4</i>               |        |     |           |     | 0      | 0   | 1      | 1   |        |     |
| SP_0064  | PTS system; IIA component                    | <i>S. pneumoniae TIGR4</i>               |        |     | 1         | 1   |        |     |        |     |        |     |
| SP_0238  | ACT domain protein                           | <i>S. pneumoniae TIGR4</i>               |        |     |           |     |        |     | 1      | 0   |        |     |
| SP_0291  | GTP cyclohydrolase I (foIE)                  | <i>S. pneumoniae TIGR4</i>               |        |     | 1         | 1   |        |     | 1      | 1   |        |     |
| SP_0308  | PTS system; IIA component                    | <i>S. pneumoniae TIGR4</i>               |        |     | 1         | 1   |        |     | 1      | 1   |        |     |
| SP_0321  | PTS system; IIA component                    | <i>S. pneumoniae TIGR4</i>               |        |     | 1         | 1   |        |     | 1      | 1   |        |     |
| SP_0360  | UDP-N-acetylglucosamine 2-epimerase (cps4L)  | <i>S. pneumoniae TIGR4</i>               |        |     | 1         | 1   | 1      | 1   | 1      | 1   |        |     |
| SP_0360  | UDP-N-acetylglucosamine 2-epimerase          | <i>S. pneumoniae TIGR4</i>               |        |     |           |     | 1      | 1   |        |     |        |     |
| SP_0385  | conserved hypothetical protein               | <i>S. pneumoniae TIGR4</i>               |        |     | 1         | 1   |        |     |        |     |        |     |
| SP_0416  | transcriptional regulator, MarR family       | <i>S. pneumoniae TIGR4</i>               |        |     |           |     | 0      | 0   |        |     |        |     |
| SP_0435  | translation elongation factor P (efp)        | <i>S. pneumoniae TIGR4</i>               |        |     | 1         | 1   |        |     | 0      | 0   |        |     |
| SP_0488  | conserved hypothetical protein               | <i>S. pneumoniae TIGR4</i>               |        |     | 0         | 0   |        |     | 0      | 0   |        |     |
| SP_0501  | transcriptional regulator, MerR family       | <i>S. pneumoniae TIGR4</i>               |        |     |           |     | 1      | 1   | 1      | 1   |        |     |
| SP_0526  | response regulator BlpR                      | <i>S. pneumoniae TIGR4</i>               |        |     |           |     | 1      | 1   | 0      | 0   |        |     |
| SP_0604  | sensor histidine kinase VncS (vncS)          | <i>S. pneumoniae TIGR4</i>               |        |     | 0         | 0   |        |     | 1      | 1   |        |     |
| SP_0694  | conserved domain protein                     | <i>S. pneumoniae TIGR4</i>               |        |     | 1         | 0   |        |     | 0      | 0   |        |     |
| SP_0723  | conserved domain protein                     | <i>S. pneumoniae TIGR4</i>               |        |     | 1         | 0   |        |     | 0      | 0   |        |     |
| SP_0741  | conserved hypothetical protein               | <i>S. pneumoniae TIGR4</i>               |        |     |           |     | 0      | 0   |        |     |        |     |
| SP_0789  | conserved hypothetical protein               | <i>S. pneumoniae TIGR4</i>               |        |     | 1         | 1   |        |     | 1      | 1   |        |     |
| SP_0798  | DNA-binding response regulator CiaR          | <i>S. pneumoniae TIGR4</i>               |        |     |           |     | 1      | 1   | 1      | 1   |        |     |
| SP_0805  | hydrolase; haloacid dehalogenase-like family | <i>S. pneumoniae TIGR4</i>               |        |     | 1         | 1   |        |     |        |     |        |     |
| SP_0845  | lipoprotein                                  | <i>S. pneumoniae TIGR4</i>               |        |     | 1         | 1   |        |     | 0      | 0   |        |     |
| SP_0851  | conserved hypothetical protein               | <i>S. pneumoniae TIGR4</i>               |        |     |           |     |        |     | 1      | 0   |        |     |
| SP_0937  | conserved hypothetical protein               | <i>S. pneumoniae TIGR4</i>               |        |     | 1         | 1   |        |     | 1      | 1   |        |     |
| SP_0945  | ribosome recycling factor (frr)              | <i>S. pneumoniae TIGR4</i>               |        |     | 1         | 1   |        |     |        |     |        |     |
| SP_0954  | competence protein CelA                      | <i>S. pneumoniae TIGR4</i>               |        |     | 1         | 0   |        |     | 0      | 0   |        |     |
| SP_0979  | oligoendopeptidase F (pepF)                  | <i>S. pneumoniae TIGR4</i>               |        |     | 1         | 1   |        |     | 1      | 1   |        |     |
| SP_0998  | hypothetical protein                         | <i>S. pneumoniae TIGR4</i>               |        |     |           |     | 1      | 1   |        |     |        |     |
| SP_1050  | putative transcriptional regulator           | <i>S. pneumoniae TIGR4</i>               |        |     |           |     | 1      | 1   | 1      | 1   |        |     |

Supplementary Table 1. Contd.....

| Locus ID | Protein name                                                           | Species                    | pFN18A |     | pGW-nHalo |     | pFN19A |     | pFC20A |     | pFC14A |     |
|----------|------------------------------------------------------------------------|----------------------------|--------|-----|-----------|-----|--------|-----|--------|-----|--------|-----|
|          |                                                                        |                            | Exp    | Sol | Exp       | Sol | Exp    | Sol | Exp    | Sol | Exp    | Sol |
| SP_1102  | conserved hypothetical protein TIGR00103                               | <i>S. pneumoniae TIGR4</i> |        |     | 1         | 1   |        |     | 1      | 1   |        |     |
| SP_1118  | pullulanase; putative                                                  | <i>S. pneumoniae TIGR4</i> |        |     | 0         | 0   |        |     |        |     |        |     |
| SP_1130  | transcriptional regulator                                              | <i>S. pneumoniae TIGR4</i> |        |     |           |     | 1      | 1   | 1      | 1   |        |     |
| SP_1131  | putative transcriptional regulator                                     | <i>S. pneumoniae TIGR4</i> |        |     |           |     | 0      | 0   | 1      | 0   |        |     |
| SP_1132  | hypothetical protein                                                   | <i>S. pneumoniae TIGR4</i> |        |     |           |     |        |     | 1      | 1   |        |     |
| SP_1227  | DNA-binding response regulator                                         | <i>S. pneumoniae TIGR4</i> |        |     |           |     | 0      | 0   | 1      | 1   |        |     |
| SP_1249  | guanosine monophosphate reductase (guaC)                               | <i>S. pneumoniae TIGR4</i> |        |     | 1         | 1   |        |     | 0      | 0   |        |     |
| SP_1362  | putative transcriptional regulator MecA                                | <i>S. pneumoniae TIGR4</i> |        |     |           |     | 1      | 1   | 1      | 1   |        |     |
| SP_1372  | conserved hypothetical protein                                         | <i>S. pneumoniae TIGR4</i> |        |     | 0         | 0   |        |     | 0      | 0   |        |     |
| SP_1423  | putative transcriptional repressor                                     | <i>S. pneumoniae TIGR4</i> |        |     |           |     | 1      | 1   | 0      | 0   |        |     |
| SP_1504  | TPR domain protein                                                     | <i>S. pneumoniae TIGR4</i> |        |     | 1         | 1   |        |     | 1      | 1   |        |     |
| SP_1524  | aminotransferase; class II                                             | <i>S. pneumoniae TIGR4</i> |        |     | 1         | 1   |        |     |        |     |        |     |
| SP_1572  | non-heme iron-containing ferritin                                      | <i>S. pneumoniae TIGR4</i> |        |     | 1         | 1   |        |     | 1      | 1   |        |     |
| SP_1631  | threonyl-tRNA synthetase (thrS)                                        | <i>S. pneumoniae TIGR4</i> |        |     | 1         | 1   |        |     | 1      | 1   |        |     |
| SP_1638  | iron-dependent transcriptional regulator                               | <i>S. pneumoniae TIGR4</i> |        |     |           |     | 1      | 1   | 0      | 0   |        |     |
| SP_1650  | manganese ABC transporter; manganese-binding adhesion liprotein (psaA) | <i>S. pneumoniae TIGR4</i> |        |     | 1         | 1   |        |     | 1      | 1   |        |     |
| SP_1671  | D-alanine--D-alanine ligase (ddlA)                                     | <i>S. pneumoniae TIGR4</i> |        |     | 1         | 1   |        |     | 1      | 1   |        |     |
| SP_1699  | holo-(acyl-carrier protein) synthase (acpS)                            | <i>S. pneumoniae TIGR4</i> |        |     | 1         | 1   | 1      | 1   | 0      | 0   |        |     |
| SP_1714  | transcriptional regulator, GntR family                                 | <i>S. pneumoniae TIGR4</i> |        |     |           |     | 1      | 1   | 1      | 1   |        |     |
| SP_1752  | mechanosensitive ion channel; putative                                 | <i>S. pneumoniae TIGR4</i> |        |     | 1         | 1   |        |     | 0      | 0   |        |     |
| SP_1774  | putative transcriptional regulator                                     | <i>S. pneumoniae TIGR4</i> |        |     |           |     | 1      | 1   | 1      | 1   |        |     |
| SP_1797  | ABC transporter, permease protein                                      | <i>S. pneumoniae TIGR4</i> |        |     | 1         | 1   |        |     |        |     |        |     |
| SP_1799  | sugar-binding transcriptional regulator, LacI family                   | <i>S. pneumoniae TIGR4</i> |        |     |           |     | 1      | 1   | 1      | 1   |        |     |
| SP_1802  | hypothetical protein                                                   | <i>S. pneumoniae TIGR4</i> |        |     | 1         | 1   |        |     | 1      | 0   |        |     |
| SP_1802  | hypothetical protein                                                   | <i>S. pneumoniae TIGR4</i> |        |     |           |     | 1      | 1   |        |     |        |     |
| SP_1813  | N-(5'-phosphoribosyl)-anthranilate isomerase (trpF)                    | <i>S. pneumoniae TIGR4</i> |        |     | 1         | 1   |        |     | 0      | 0   |        |     |
| SP_1823  | MgtC/SapB family protein                                               | <i>S. pneumoniae TIGR4</i> |        |     | 1         | 1   |        |     | 0      | 0   |        |     |
| SP_1863  | transcriptional regulator, MarR family                                 | <i>S. pneumoniae TIGR4</i> |        |     |           |     | 0      | 0   |        |     |        |     |
| SP_1910  | conserved hypothetical protein                                         | <i>S. pneumoniae TIGR4</i> |        |     | 0         | 0   |        |     | 1      | 1   |        |     |
| SP_1925  | hypothetical protein                                                   | <i>S. pneumoniae TIGR4</i> |        |     | 1         | 1   |        |     | 1      | 1   |        |     |
| SP_1959  | nucleoside diphosphate kinase (ndk)                                    | <i>S. pneumoniae TIGR4</i> |        |     | 1         | 1   |        |     | 1      | 1   |        |     |

Supplementary Table 1. Contd.....

| Locus ID | Protein name                                | Species                    | pFN18A |     | pGW-nHalo |     | pFN19A |     | pFC20A |     | pFC14A |     |
|----------|---------------------------------------------|----------------------------|--------|-----|-----------|-----|--------|-----|--------|-----|--------|-----|
|          |                                             |                            | Exp    | Sol | Exp       | Sol | Exp    | Sol | Exp    | Sol | Exp    | Sol |
| SP_1978  | diaminopimelate decarboxylase (lysA)        | <i>S. pneumoniae TIGR4</i> |        |     | 1         | 1   |        |     | 1      | 1   |        |     |
| SP_1980  | cmp-binding-factor 1                        | <i>S. pneumoniae TIGR4</i> |        |     | 1         | 1   |        |     | 1      | 1   |        |     |
| SP_1999  | catabolite control protein A                | <i>S. pneumoniae TIGR4</i> |        |     |           |     | 1      | 1   | 1      | 1   |        |     |
| SP_2039  | conserved hypothetical protein              | <i>S. pneumoniae TIGR4</i> |        |     | 1         | 1   |        |     | 1      | 1   |        |     |
| SP_2077  | putative transcriptional repressor          | <i>S. pneumoniae TIGR4</i> |        |     |           |     | 0      | 0   | 0      | 0   |        |     |
| SP_2105  | hypothetical protein                        | <i>S. pneumoniae TIGR4</i> |        |     | 1         | 1   | 0      | 0   | 0      | 0   |        |     |
| SP_2105  | hypothetical protein                        | <i>S. pneumoniae TIGR4</i> |        |     |           |     | 0      | 0   |        |     |        |     |
| SP_2119  | putative transcriptional regulator          | <i>S. pneumoniae TIGR4</i> |        |     |           |     | 1      | 1   | 1      | 1   |        |     |
| SP_2209  | conserved hypothetical protein              | <i>S. pneumoniae TIGR4</i> |        |     | 1         | 1   |        |     | 1      | 1   |        |     |
| SP_2235  | response regulator ComE                     | <i>S. pneumoniae TIGR4</i> |        |     |           |     | 1      | 1   | 1      | 1   |        |     |
| y0011    | Hypothetical protein                        | <i>Y. pestis Kim10</i>     |        |     |           |     | 1      | 1   |        |     |        |     |
| Y0018    | putative IS element protein                 | <i>Y. pestis Kim10</i>     | 1      | 1   |           |     |        |     |        |     |        |     |
| Y0043    | Yop secretion and targeting control protein | <i>Y. pestis Kim10</i>     | 0      | 0   |           |     |        |     |        |     |        |     |
| Y0045    | hypothetical protein                        | <i>Y. pestis Kim10</i>     | 1      | 1   |           |     |        |     |        |     |        |     |
| Y0046    | hypothetical protein                        | <i>Y. pestis Kim10</i>     | 1      | 1   |           |     |        |     |        |     |        |     |
| Y0048    | low calcium response protein R              | <i>Y. pestis Kim10</i>     | 1      | 0   |           |     |        |     |        |     |        |     |
| Y0049    | low calcium response protein G              | <i>Y. pestis Kim10</i>     | 1      | 1   |           |     |        |     |        |     |        |     |
| Y0050    | secreted effector protein                   | <i>Y. pestis Kim10</i>     | 0      | 0   |           |     |        |     |        |     |        |     |
| Y0052    | secreted effector protein                   | <i>Y. pestis Kim10</i>     | 1      | 1   |           |     |        |     |        |     |        |     |
| Y0078    | secretion chaperone                         | <i>Y. pestis Kim10</i>     | 1      | 1   |           |     |        |     |        |     |        |     |
| Y0082    | secretion chaperone                         | <i>Y. pestis Kim10</i>     | 1      | 1   |           |     |        |     |        |     |        |     |
| y0549    | Hypothetical protein                        | <i>Y. pestis Kim10</i>     |        |     |           |     | 1      | 1   |        |     |        |     |
| y0636    | Hypothetical protein                        | <i>Y. pestis Kim10</i>     |        |     |           |     | 1      | 1   |        |     |        |     |
| y0931    | Hypothetical protein                        | <i>Y. pestis Kim10</i>     |        |     |           |     | 1      | 1   |        |     |        |     |
| y0974    | Hypothetical protein                        | <i>Y. pestis Kim10</i>     |        |     |           |     | 0      | 0   | 0      | 0   |        |     |
| y1125    | Hypothetical protein                        | <i>Y. pestis Kim10</i>     |        |     |           |     | 1      | 1   |        |     |        |     |
| y1333    | Hypothetical protein                        | <i>Y. pestis Kim10</i>     |        |     |           |     | 0      | 0   | 0      | 0   |        |     |
| y1724    | Hypothetical protein                        | <i>Y. pestis Kim10</i>     |        |     |           |     | 1      | 1   |        |     |        |     |
| y1726    | Hypothetical protein                        | <i>Y. pestis Kim10</i>     |        |     |           |     | 1      | 1   |        |     |        |     |
| y2136    | Hypothetical protein                        | <i>Y. pestis Kim10</i>     |        |     |           |     | 0      | 0   |        |     |        |     |
| y2245    | Hypothetical protein                        | <i>Y. pestis Kim10</i>     |        |     |           |     | 1      | 1   |        |     |        |     |
| y2259    | Hypothetical protein                        | <i>Y. pestis Kim10</i>     |        |     |           |     | 1      | 0   |        |     |        |     |
| y2737    | Hypothetical protein                        | <i>Y. pestis Kim10</i>     |        |     |           |     | 1      | 0   |        |     |        |     |
| y3130    | Hypothetical protein                        | <i>Y. pestis Kim10</i>     |        |     |           |     | 1      | 1   |        |     |        |     |

Supplementary Table 1. Contd.....

| Locus ID | Protein name                    | Species                | pFN18A |     | pGW-nHalo |     | pFN19A |     | pFC20A |     | pFC14A |     |
|----------|---------------------------------|------------------------|--------|-----|-----------|-----|--------|-----|--------|-----|--------|-----|
|          |                                 |                        | Exp    | Sol | Exp       | Sol | Exp    | Sol | Exp    | Sol | Exp    | Sol |
| y3658    | Hypothetical protein            | <i>Y. pestis Kim10</i> | 0      | 0   |           |     |        |     |        |     |        |     |
| y3659    | Hypothetical protein            | <i>Y. pestis Kim10</i> | 0      | 0   |           |     |        |     |        |     |        |     |
| y3660    | Hypothetical protein            | <i>Y. pestis Kim10</i> | 1      | 1   |           |     |        |     |        |     |        |     |
| y3663    | Hypothetical protein            | <i>Y. pestis Kim10</i> | 1      | 1   |           |     |        |     |        |     |        |     |
| y3664    | Hypothetical protein            | <i>Y. pestis Kim10</i> | 0      | 0   |           |     |        |     |        |     |        |     |
| y3665    | Hypothetical protein            | <i>Y. pestis Kim10</i> | 1      | 1   |           |     |        |     |        |     |        |     |
| y3668    | Hypothetical protein            | <i>Y. pestis Kim10</i> | 0      | 0   |           |     |        |     |        |     |        |     |
| y3669    | putative ATP-dependent protease | <i>Y. pestis Kim10</i> | 1      | 1   |           |     |        |     |        |     |        |     |
| y3671    | Hypothetical protein            | <i>Y. pestis Kim10</i> | 1      | 1   |           |     |        |     |        |     |        |     |
| y3673    | Hypothetical protein            | <i>Y. pestis Kim10</i> | 1      | 0   |           |     |        |     |        |     |        |     |
| y3674    | Hypothetical protein            | <i>Y. pestis Kim10</i> | 1      | 0   |           |     |        |     |        |     |        |     |
| y3675    | Hypothetical protein            | <i>Y. pestis Kim10</i> | 1      | 1   |           |     |        |     |        |     |        |     |
| y3676    | Hypothetical protein            | <i>Y. pestis Kim10</i> | 1      | 0   |           |     |        |     |        |     |        |     |
| y3714    | Hypothetical protein            | <i>Y. pestis Kim10</i> |        |     |           |     | 1      | 0   | 0      | 0   |        |     |
| y3978    | Hypothetical protein            | <i>Y. pestis Kim10</i> |        |     |           |     | 1      | 1   |        |     |        |     |

Proteins were expressed in HEK293T (pFC14A) and in BL21(DE3)/pMagic (pFN18A, pFN19A, pFC20A and pGW-nHalo)

0: No expression or Insoluble

1: Expression or Soluble
